# Supplementary material for: Monodisperse magnetic mesoporous silica microspheres facilitate the studies of gastric cancer-specific peptides in sera
Source: Royal Society of Chemistry journal article supplement (doi:10.1039/c5ra27378a), 2016-01-01
Supplement: c5ra27378a1.pdf [file c5ra27378a1.pdf]

# **Monodisperse magnetic mesoporous silica microspheres facilitate the studies of gastric cancer-specific peptides in sera**

Cao Meng<sup>1, #</sup>, Zhou Zhen-xian<sup>2, #</sup>, Cao Peng<sup>1</sup>, Wang Kun<sup>1</sup>, Zhu Gang-tian<sup>3</sup>, Feng Yu-qi<sup>3</sup>, Yan Shi-hai<sup>4</sup>, Huang Cheng-cai<sup>5</sup>, Geng Zhi-rong<sup>6</sup>, Mao Xiao-dong<sup>1</sup>, Zhao Ning-wei<sup>4, 5, \*</sup>, Liu Chao<sup>1, \*</sup>

1 Research Center of Endocrine and Metabolic disease, Jiangsu Academy of TCM, Nanjing, China;

2 The Second Hospital of Nanjing, Nanjing, China;

3 Department of Chemistry, Wuhan University, Wuhan, China;

4 Department of Pharmacology, Jiangsu Province Hospital of TCM, Nanjing, China;

5 Biomedical Research Laboratory, Shimadzu (China) Co., Ltd., Shanghai, China;

6 State Key Laboratory of Coordination Chemistry, Nanjing University, Nanjing, China.

# Cao Meng and Zhou Zhen-xian are co-first authors.

\* Correspondences: Prof. Liu Chao, No.100 Hongshan Road, Nanjing, China 210028, E-mail: liuchao\_js@sina.com; Dr. Zhao Ning-wei, No.155 Hanzhong Road, Nanjing, China 210029, E-mail: sshznw@shimadzu.com.cn.

## Supplemental Tables

**Table S1: Quantitative peptidomic results by the current strategy (\*p<0.05)**

| <b>Protein name</b>                      | <b>Peptide sequence</b>  | <b>Mr (calc)</b> | <b>[d6]-/[d0]<br/>ratio</b> |
|------------------------------------------|--------------------------|------------------|-----------------------------|
| <b>Fibrinogen <math>\alpha</math></b>    | DEAGSEADHEGTHSTKRGHAKSRP | 2559.18          | 1.20                        |
|                                          | DSGEGDFLAEGGGV           | 1308.55          | 1.26                        |
|                                          | SGEGDFLAEGGGV            | 1193.52          | 1.16                        |
|                                          | GDFLAEGGGV               | 920.42           | 1.15                        |
|                                          | MADEAGSEADHEGTHSTKRGHA   | 2292.98          | 1.13                        |
|                                          | ADEAGSEADHEGTHSTKRGHA    | 2161.94          | 0.93                        |
|                                          | DEAGSEADHEGTHSTKRGHA     | 2090.90          | 0.82                        |
|                                          | DEAGSEADHEGTHSTKRG       | 1882.80          | 1.03                        |
|                                          | ADSGEGDFLAEGGGV          | 1535.69          | 0.79                        |
|                                          | SGEGDFLAEGGGV            | 1349.62          | 0.75                        |
|                                          | GEGDFLAEGGGV             | 1262.59          | 1.31                        |
|                                          | EGDFLAEGGGV              | 1205.57          | 1.01                        |
|                                          | GDFLAEGGGV               | 1076.52          | 0.93                        |
|                                          | LAEGGGV                  | 757.41           | 1.24                        |
| <b>C3f</b>                               | SSKITHRIHWESASLLR        | 2020.10          | 0.91                        |
|                                          | SKITHRIHWE               | 1305.69          | 0.92                        |
|                                          | SKITHRIHWESASLL          | 1776.96          | 0.85                        |
|                                          | THRIHWE                  | 977.48           | 1.06                        |
| <b>C4a</b>                               | GLEEELQFSLGSKINVKVGGNS   | 2304.20          | 2.92*                       |
|                                          | RNGFKSHALQLNNRQI         | 1895.02          | 1.83*                       |
|                                          | NGFKSHALQLNNR            | 1497.78          | 1.64                        |
|                                          | SHALQLNN                 | 895.45           | 1.69                        |
| <b>ITI4</b>                              | QLGLPGPPDVPDHAAYHPFR     | 2183.09          | 1.31                        |
|                                          | QLGLPGPPDVPDHAAYHPF      | 2026.99          | 0.97                        |
|                                          | GLPGPPDVPDHAAYHPF        | 1785.85          | 0.75                        |
|                                          | GLPGPPDVPDHA             | 1170.57          | 0.93                        |
| <b>apoA-1</b>                            | ATEHLSTLSEKAKPALEDL      | 2052.07          | 1.22                        |
|                                          | VSFLSALEEYTKKLNTQ        | 1970.04          | 1.29                        |
| <b>apoA-4</b>                            | ISASAEELRQLAPLAEDVRGNL   | 2507.35          | 2.73*                       |
|                                          | SLAELGGHLDQQVEEFR        | 1926.94          | 1.89*                       |
|                                          | SLAELGGHLDQQVEEF         | 1770.84          | 1.57                        |
| <b>Transthyretin</b>                     | ALGISPFHEHAEVVFTANDSGPR  | 2450.20          | 1.37                        |
|                                          | ALLSPYSYSTTAVVTNPKE      | 2040.04          | 1.08                        |
|                                          | SYSTTAVVTNPKE            | 1395.69          | 1.25                        |
| <b>Antichymotrypsin</b>                  | IIVPTDTQNIFFMSKVTNPQKA   | 2491.31          | 0.86                        |
| <b><math>\alpha</math>-1 antitrypsin</b> | LMIDQNTKSPLFMGKVVNPTQK   | 2488.32          | 0.97                        |
| <b>Protein c inhibitor</b>               | SARLNSQRLVFNRPFLMF       | 2195.18          | 1.22                        |
|                                          | SARLNSQRLVFNRPFLM        | 2048.11          | 0.87                        |

|                      |                   |         |       |
|----------------------|-------------------|---------|-------|
| <b>Serum albumin</b> | DAHKSEVAHRF       | 1295.64 | 1.19  |
|                      | DAHKSEVAHRFKD     | 1538.76 | 0.90  |
| <b>SAA</b>           | PNHFRPAGLPEKY     | 1524.78 | 1.13  |
| <b>Clusterin</b>     | HFFFPKSRIV        | 1276.71 | 2.32* |
| <b>Bradykinin</b>    | RPPGFSPFR         | 1059.56 | 0.81  |
| <b>C3 precursor</b>  | SEETKENEGFTVTAEGK | 1854.85 | 0.54* |

**Table S2: Quantitative peptidomic results by our novel strategy (\*p<0.05)**

| <b>Protein name</b>                   | <b>Peptide sequence</b>                     | <b>Mr (calc)</b>  | <b>[d6]-/[d0] ratio</b> |
|---------------------------------------|---------------------------------------------|-------------------|-------------------------|
| <b>Fibrinogen <math>\alpha</math></b> | SSSYSKQFTSSTSYNRGDSTFESKS                   | 2767.22           | 1.12                    |
|                                       | SSSYSKQFTSSTSYNRGDSTFESKSY                  | 2930.28           | 1.26                    |
|                                       | SSSYSKQFTSSTSYNRGDSTFESKSYKM                | 3189.42           | 1.39                    |
|                                       | SYKMADEAGSEADHEGTHSTKRGHAKSRPV              | 3238.52           | 0.71                    |
|                                       | SYKMADEAGSEADHEGTHSTKRGHA                   | 2671.17           | 0.71                    |
|                                       | KMADEAGSEADHEGTHSTKRGHAKSRPV                | 2988.42           | 0.82                    |
|                                       | MADEAGSEADH <sub>CH3</sub> EGTHSTKRGHAKSRPV | 2874.36           | 1.23                    |
|                                       | MADEAGSEADHEGTHSTKRGHAKSRPV                 | 2860.33           | 1.33                    |
|                                       | MADEAGSEADHEGTHSTKRGHAKSRP                  | 2761.26           | 1.49                    |
|                                       | DEAGSEADHEGTHSTKRGHAKSRPV                   | 2658.25           | 1.43                    |
|                                       | DEAGSEADHEGTHSTKRGHAKSRP                    | 2559.18           | 1.38                    |
|                                       | EAGSEADHEGTHSTKRGHAKSRPV                    | 2543.22           | 1.31                    |
|                                       | GSESGIFTNTKESSSHHPGIAEFPSRG                 | 2815.32           | 1.28                    |
|                                       | DSGEGDFLAEGGGV                              | 1308.55           | 1.27                    |
|                                       | SGEGDFLAEGGGV                               | 1193.52           | 1.41                    |
|                                       | GDFLAEGGGV                                  | 920.42            | 1.31                    |
|                                       | DFLAEGGGV                                   | 863.40            | 1.19                    |
|                                       | FLAEGGGV                                    | 748.38            | 0.92                    |
|                                       | FLAEGGG                                     | 649.31            | 0.86                    |
|                                       | DFLAEGG                                     | 707.31            | 0.75                    |
|                                       | SYKMADEAGSEADHEGTHSTK                       | 2249.95           | 0.65                    |
|                                       | SYKMADEAGSEADHEGTHST                        | 2121.85           | 0.71                    |
|                                       | MADEAGSEADHEGTHSTKRGHA                      | 2292.98           | 1.13                    |
|                                       | ADEAGSEADHEGTHSTKRGHA                       | 2161.94           | 1.06                    |
|                                       | DEAGSEADHEGTHSTKRGHA                        | 2090.90           | 1.15                    |
|                                       | DEAGSEADHEGTHSTKRG                          | 1882.80           | 1.08                    |
|                                       | ADSGEGDFLAEGGGVR                            | 1535.69           | 1.05                    |
|                                       | SGEGDFLAEGGGVR                              | 1349.62           | 1.28                    |
|                                       | GEGDFLAEGGGVR                               | 1262.59           | 1.44                    |
|                                       | EGDFLAEGGGVR                                | 1205.57           | 1.35                    |
|                                       | GDFLAEGGGVR                                 | 1076.52           | 1.26                    |
|                                       | LAEGGGVR                                    | 757.41            | 1.21                    |
|                                       | <b>C3f</b>                                  | SSKITHRIHWESASLLR | 2020.10                 |
| SKITHRIHWE                            |                                             | 1305.69           | 0.76                    |

|                                          |                                   |         |       |
|------------------------------------------|-----------------------------------|---------|-------|
|                                          | SKITHRIHWESASLL                   | 1776.96 | 1.01  |
|                                          | KITHRIHWESASLL                    | 1689.93 | 1.31  |
|                                          | THRIHWESASLL                      | 1448.75 | 0.78  |
|                                          | THRIHWE                           | 977.48  | 0.69  |
|                                          | HRIHWESASLL                       | 1347.70 | 1.45  |
|                                          | IHWESASLL                         | 1054.54 | 0.98  |
|                                          | HWESASLL                          | 941.46  | 1.35  |
|                                          | HWESASL                           | 828.38  | 1.06  |
| <b>C3 precursor</b>                      | SEETKENEGFTVTAEGK                 | 1854.85 | 0.42* |
| <b>C4a</b>                               | GLEEELQFSLGSKINVKVGGS             | 2304.20 | 3.92* |
|                                          | RNGFKSHALQLNNRQI                  | 1895.02 | 2.86* |
|                                          | NGFKSHALQLNNR                     | 1497.78 | 3.15* |
|                                          | SHALQLNN                          | 895.45  | 1.46  |
|                                          | GLEEELQFSLGSKINVKVGGSKGT          | 2703.44 | 1.17  |
|                                          | DDPDAPLQPVTPLQLFEGRRN             | 2377.20 | 2.45* |
| <b>ITI4</b>                              | MNFRPGVLSRQLGLPGPPDVPDHAAYHPF     | 3271.63 | 1.35  |
|                                          | PGVLSRQLGLPGPPDVPDHAAYHPF         | 2723.38 | 1.19  |
|                                          | GVLSSRQLGLPGPPDVPDHAAYHPF         | 2626.33 | 0.82  |
|                                          | QLGLPGPPDVPDHAAYHPFR              | 2183.09 | 136   |
|                                          | QLGLPGPPDVPDHAAYHPF               | 2026.99 | 1.31  |
|                                          | GLPGPPDVPDHAAYHPF                 | 1785.85 | 1.09  |
|                                          | GLPGPPDVPDHA                      | 1170.57 | 1.01  |
|                                          | GLPGPPDVPDH                       | 1099.53 | 0.79  |
|                                          | PGPPDVPDHA                        | 1000.46 | 0.71  |
|                                          | GPPDVPDH                          | 832.37  | 1.12  |
|                                          | GSEMVVAGKLQDR                     | 1388.71 | 1.01  |
| <b>apoA-1</b>                            | QGLLPVLESFKVSFLSALEEYTKKLNTQ      | 3181.73 | 0.83  |
|                                          | ATEHLSTLSEKAKPAEDL                | 2052.07 | 1.39  |
|                                          | VSFLSALEEYTKKLNTQ                 | 1970.04 | 1.59  |
|                                          | ELQEGARQKLHELQE                   | 1806.92 | 1.03  |
| <b>apoA-4</b>                            | ISASAEELRQLAPLAEDVRGNL            | 2507.35 | 1.97* |
|                                          | GNTEGLQKSLAELGGHLDQQVEEFR         | 2754.36 | 1.81  |
|                                          | SLAELGGHLDQQVEEFR                 | 1926.94 | 2.54* |
|                                          | SLAELGGHLDQQVEEF                  | 1770.84 | 3.78* |
| <b>HMW-Kininogen</b>                     | KHNLGHGHKHERDQGHGHQ               | 2208.05 | 2.79* |
|                                          | NLGHGHKHERDQGHGHQ                 | 1942.90 | 1.84* |
| <b>Transthyretin</b>                     | DSGPRRYTIAALLSPYSYSTTAVVTNPKE     | 3156.61 | 1.11  |
|                                          | ALGISPFHEHAEVVFTANDSGPR           | 2450.20 | 0.94  |
|                                          | ALLSPYSYSTTAVVTNPKE               | 2040.04 | 0.79  |
|                                          | SYSTTAVVTNPKE                     | 1395.69 | 1.23  |
| <b>Antichymotrypsin</b>                  | LMIIVPTDTQNIFFMSKVTPKQA           | 2735.44 | 1.02  |
|                                          | IIVPTDTQNIFFMSKVTPKQA             | 2491.31 | 1.36  |
| <b>CK18</b>                              | DSSNSMQTIQKTTTRRIVDGVVSETNDTKVLRH | 3843.99 | 4.67* |
| <b><math>\alpha</math>-1 antitrypsin</b> | LMIDQNTKSPLFMGKVVNPTQK            | 2488.32 | 0.92  |
| <b>Proapolipoprotein</b>                 | LEEYTKKLNTQ                       | 1365.71 | 1.25  |

|                            |                                                  |         |       |
|----------------------------|--------------------------------------------------|---------|-------|
| <b>CK9</b>                 | SRSGGGGGGGLGSGGSIRSSY                            | 1811.85 | 1.37  |
| <b>Protein c inhibitor</b> | SARLNSQRLVFNRPFLMFIVDNNILFLGKVNRP                | 3888.15 | 0.81  |
|                            | SARLNSQRLVFNRPFLMF                               | 2195.18 | 0.95  |
|                            | SARLNSQRLVFNRPFLM                                | 2048.11 | 1.09  |
| <b>Serum albumin</b>       | DAHKSEVAHRF                                      | 1295.64 | 1.03  |
|                            | DAHKSEVAHRFKD                                    | 1538.76 | 0.96  |
| <b>SAA</b>                 | PNHFRPAGLPEKY                                    | 1524.78 | 1.39  |
| <b>apoC-1</b>              | FQKVKEKLIKIDS                                    | 1461.86 | 1.25  |
| <b>C1-inhibitor</b>        | MGRVYDPRA                                        | 1063.52 | 1.46  |
| <b>apoE</b>                | AATVGSLAGQPLQERAQAWGERLR                         | 2564.36 | 1.64* |
|                            | AATVGSLAGQPLQERAQAWGERL                          | 2408.26 | 2.83* |
| <b>Clusterin</b>           | HFFFPKSRIV                                       | 1276.71 | 2.05* |
|                            | HFFFPK                                           | 821.42  | 2.77* |
| <b>Bradykinin</b>          | RPPGFSPFR                                        | 1059.56 | 0.82  |
|                            | RPPGFSPF                                         | 903.46  | 1.06  |
| <b>Factor XIII</b>         | AVPPNNSNAEDDLPTVELQGVVPR                         | 2601.30 | 1.37  |
| <b>Ghrelin</b>             | GSS <sub>octanoyl</sub> FLSPEHQRVQQRKESKPPAKLQPR | 3371.87 | 4.46* |
